# Supplementary material
Source: publisher figshare collection journal article supplement (https://gsajournals.figshare.com/ndownloader/files/31271188)
Supplement: Supplementary file 1 [file 31271188]

## Sheet: Sheet1
	Supplementary Table S4. PCR assay results and fluorescence phenotypes for candidate insertion lines derived from attB_retrofitted_Si47D10
	Note, we examined all candidate good lines (lack of GFP and RFP fluorescence) as well as known incorrect lines (GFP, RFP, or both)
					Orientation 1		Orientation 2			BAC position
	Strain	Allele	Isolate name	Conclusion*	left	right	left	right	phiC31	1kB	20kB	50kB	65kB	80kB	100kB	120kB	kanR	cb-unc-119	GFP-pcr	RFP-pcr	GFP-visual	RFP-visual	NOTES
	BRC0763	antIs39	cLL-1c-2y-4	Complex	Y	Y	N	N	N	Y	Y	Y	Y	Y	Y	Y	Y	Y	Y	n/a	myo-2	no
	BRC0766	antIs40	cBB-4a-2x	Incomplete [candidate good line]	N	N	Y	Y	N	Y	Y	N	N	N	N	Y	Y	Y	n/a	n/a	no	no
	BRC0767	antIs41	dII-2a-1	Complex	Y	Y	N	N	N	Y	Y	Y	Y	Y	Y	Y	Y	Y	Y	n/a	sur-5	weak or none
	BRC0768	antIs42	cGG-4a-2y	Complex & incomplete	N	N	N	Y	N	Y	N	Y	Y	Y	Y	Y	Y	Y	n/a	n/a	sur-5	weak or none	BRC0768 and BRC0770 have same ancestor but different outcome
	BRC0769	antIs43	cKK-1a-4	Complex & incomplete	Y	N	N	Y	N	Y	N	N	Y	N	Y	Y	Y	Y	n/a	n/a	sur-5	yes
	BRC0770	antIs44	cGG-4b-1y-2	Complex & incomplete	N	Y	N	N	N	Y	N	N	N	N	N	Y	Y	Y	n/a	n/a	faint tail gfp	weak or none	BRC0768 and BRC0770 have same ancestor but different outcome
	BRC0775	antIs45	cFF-2b-3v	Complex & incomplete	N	Y	N	N	N	Y	N	N	N	N	N	N	Y	Y	Y	Y	yes	yes
	BRC0776	antIs46	dEE-5a-2	Complex & incomplete, ectopic integration?	N	N	N	N	N	Y	N	Y	N	Y	N	Y	Y	Y	n/a	n/a	sur-5	weak or none
	BRC0779	antIs47	eDD-1i-2b	Complex	N	Y	Y	Y	N	Y	Y	Y	Y	Y	Y	Y	Y	Y	Y	N	yes	n/a	Injection included spermine and spermidine; no mCherry co-injection marker
	BRC0780	antIs48	cGG-3d-1x	Complex & incomplete [candidate good line]	Y	N	N	N	N	N	N	N	N	N	N	N	N	Y	n/a	n/a	no	no
	BRC0781	antIs49	eCC-2f-4b	Complex	N	N	Y	Y	N	Y	Y	Y	Y	Y	Y	Y	Y	Y	Y	N	yes	n/a	Injection included spermine and spermidine; no mCherry co-injection marker; BRC0781 and BRC0782 have same ancestor but different outcome
	BRC0782	antIs50	eCC-2s-1a	Complex	Y	N	Y	Y	N	Y	Y	Y	Y	Y	Y	Y	Y	Y	Y	N	yes, weak	n/a	Injection included spermine and spermidine; no mCherry co-injection marker; BRC0781 and BRC0782 have same ancestor but different outcome
	BRC0787	antIs51	dTT-7b	Complex	Y	Y	N	N	N	Y	Y	Y	Y	Y	Y	Y	Y	Y	Y	FAINT	yes	no?
	BRC0788	antIs52	cGG-2d-3a	Complex	N	N	Y	Y	N	Y	Y	Y	Y	Y	Y	Y	Y	Y	Y	Y	yes	yes
	BRC0789	antIs53	dQQ-1b-4	Complex	N	N	Y	Y	N	Y	Y	Y	Y	Y	Y	Y	Y	Y	n/a	n/a	sur-5	weak or none
	BRC0791	antIs54	dSS-12a	Complex	N	Y	Y	Y	N	Y	Y	Y	Y	Y	Y	Y	Y	Y	Y	N	yes	no?
	BRC0792	antIs55	eDD-3c-1c	Complex & incomplete	Y	N	N	Y	N	Y	N	N	N	N	Y	Y	Y	Y	Y	N	myo-2 (no sur-5)	n/a	Injection included spermine and spermidine; no mCherry co-injection marker
	BRC0793	antIs56	dTT-8a-4	Complex	N	N	Y	Y	N	Y	Y	Y	Y	Y	Y	Y	Y	Y	Y	FAINT	yes	no?
	BRC0803	antIs57	cJJ-2d-2a	Ecotopic integration?	N	N	N	N	N	Y	Y	Y	Y	Y	Y	Y	Y	Y	Y	Y	yes	no
	BRC0804	antIs58	dEE-3a-1	Complex	Y	N	N	Y	N	Y	Y	Y	Y	Y	Y	Y	Y	Y	n/a	n/a	sur-5	weak or none
	BRC0805	antIs59	dTT-2b	Complex	N	N	N	Y	N	Y	Y	Y	Y	Y	Y	Y	Y	Y	n/a	n/a	sur-5	weak or none
	BRC0882	antIs33	dHH-1a-1	ONT sequencing indicates ~3x copies [candidate good line]	Y	Y	N	N	N	Y	Y	Y	Y	Y	Y	Y	Y	Y	N	N	no	no	1x out crossed to N2
	* Definitions:
	Incomplete: Part of the BAC was not integrated based on at least one failed PCR assay
	Complex: any of: too many or too few recombination junctions present, inclusion of GFP (either from docking site or BAC) or RFP. This likely implies recombination between BAC and co-injection plasmid and/or itself prior to integration.
	Candidate good line: discussed in main text and main Table 1
	n/a, not tested
